# Supplementary material for: Temperature dependent poly(l-lactide) crystallization investigated by Fourier transform terahertz spectroscopy
Source: Royal Society of Chemistry journal article supplement (doi:10.1039/d1ma00195g), 2021-01-01
Supplement: d1ma00195g1.pdf [file d1ma00195g1.pdf]

Electronic Supplementary Material (ESI) for Materials Advances.  
This journal is © The Royal Society of Chemistry 2021

## Supplementary Information *for*

### Temperature dependent poly(L-lactide) crystallization investigated by Fourier transform terahertz spectroscopy

Seiichiro Ariyoshi\*<sup>a</sup>, Satoshi Ohnishi<sup>a</sup>, Hikaru Mikami<sup>a</sup>, Hideto Tsuji<sup>a</sup>, Yuki Arakawa<sup>a</sup>, Saburo Tanaka<sup>a</sup> and Nobuya Hiroshiba\*<sup>b</sup>

<sup>a</sup> Toyohashi University of Technology, 1-1 Hibarigaoka, Tempaku-cho, Toyohashi, Aichi 441-8580, Japan.

<sup>b</sup> Osaka Institute of Technology, 5-16-1 Omiya, Asahi-ku, Osaka, 535-8585 Japan.

\* E-mail address: ariyoshi@tut.jp, nobuya.hiroshiba@oit.ac.jp

#### S1 – Comment on Difference between Two Spectrometers

The main difference between conventional systems and ours (FARIS-S) is the piece number of half-mirrors contributing to the interference. In the conventional system (Fig. S1(a)), the half power of incident THz-wave passes through a horizontal polarizer, where the reflected power goes away from the entrance. The polarized THz-wave is split by only one half-mirror (beam splitter, 45° rotated) and goes to fixed and moving mirrors respectively. The reflected THz-wave with different phase meets again at the same half-mirror, then the output power is measured by a detector.

On the other hand, our system has two half-mirrors (Fig. S1(b)). In this system, incident THz-wave is divided into two directions by the FIRST half-mirror, and both routes contribute to the interference by the SECOND half-mirror. This is the reason why our system enables a signal that is double as strong as that obtained using the conventional systems.

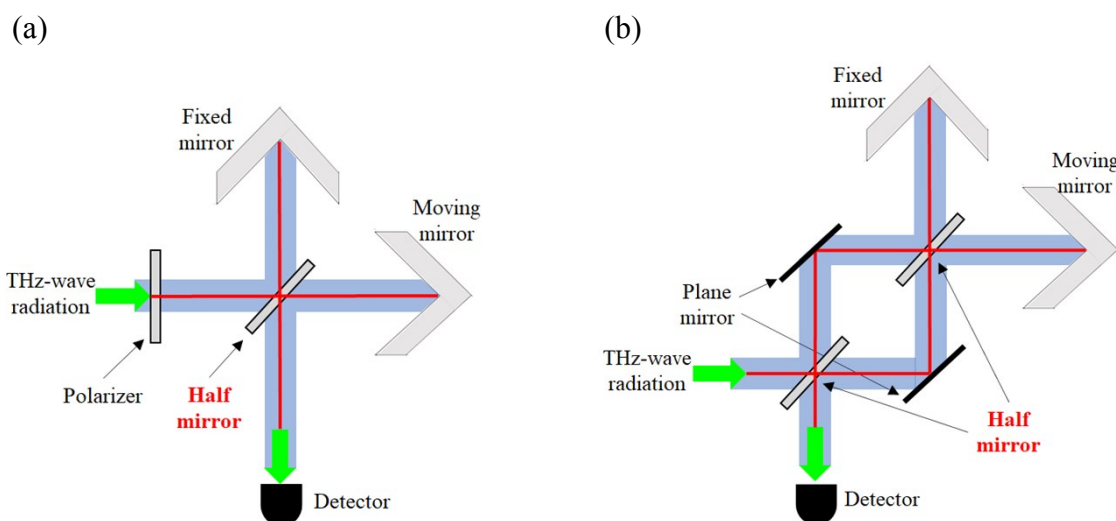

**Fig. S1** Difference between Two Spectrometers. (a) Conventional systems. (b) Our system (FARIS-S).
